# Supplementary material
Source: ML conference proceedings conference paper supplement (https://openreview.net/forum?id=x1uGDeV6ter)
Supplement: supplementary_material [file attachment]

## A APPENDIX

We have included the front camera, rear camera, original radar data, baseline reconstructions, and algorithm 2 reconstruction for all the frames across all three scenes.

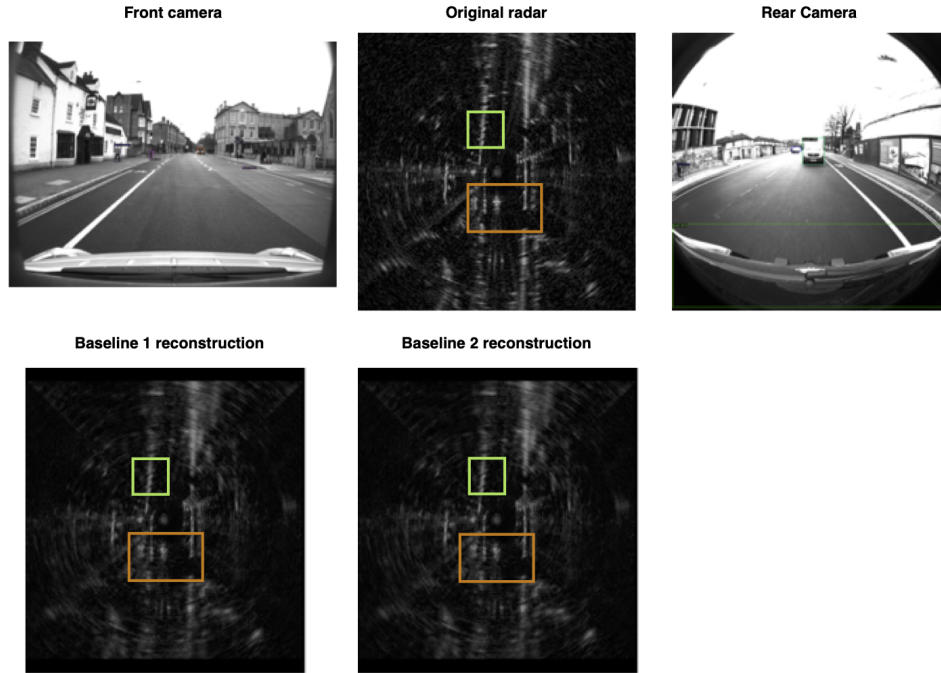

Figure 4: Scene 1 frame 1. The green box on the radar data, shows the person to the left on the front camera. The orange box highlights the truck on the rear image.

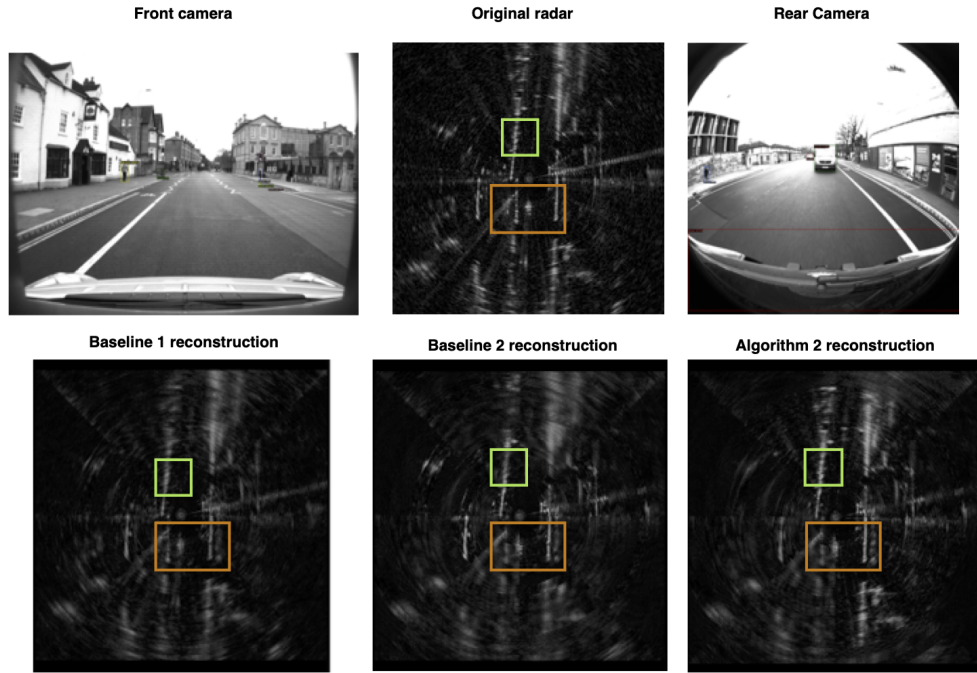

Figure 5: Scene 1 frame 2. The green box on the radar data, shows the person to the left on the front camera. The orange box highlights the truck on the rear image.

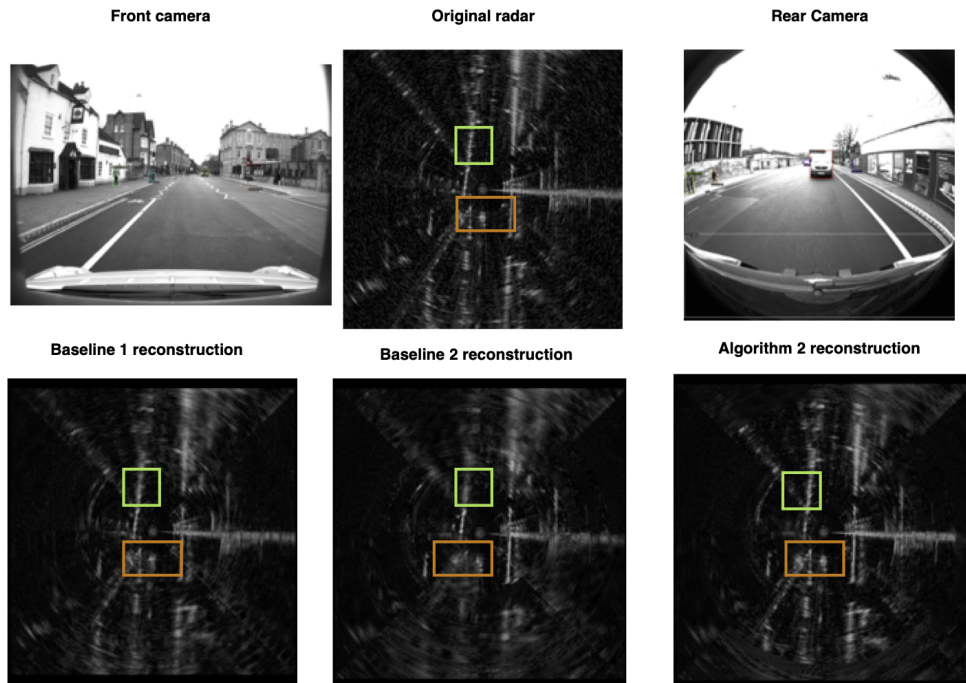

Figure 6: Scene 1 frame 3. The green box on the radar data, shows the person to the left on the front camera. The orange box highlights the truck on the rear image.



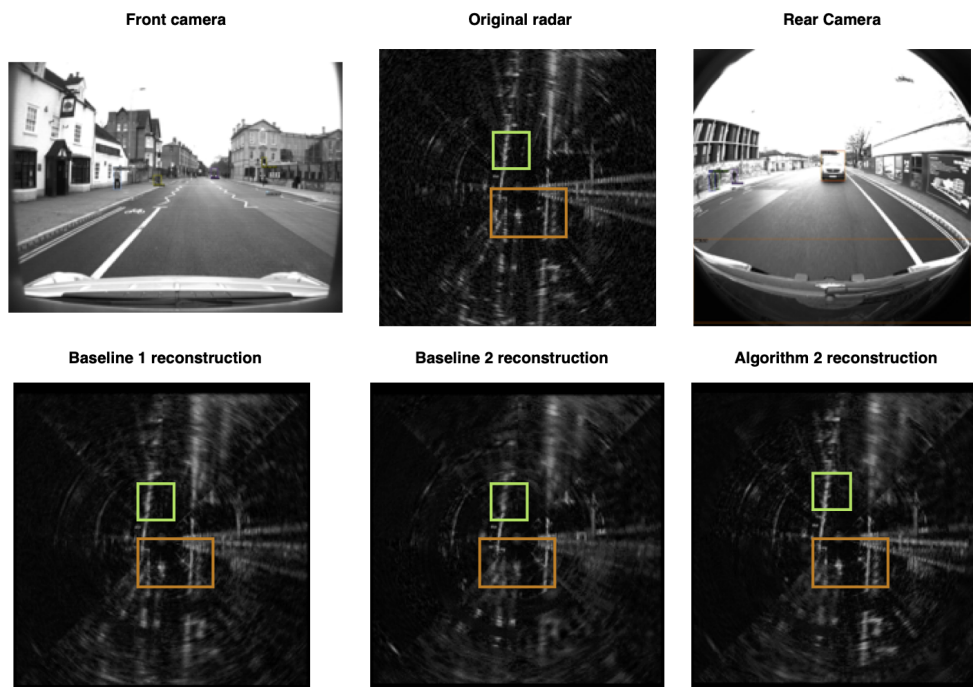

Figure 7: Scene 1 frame 4. The green box on the radar data, shows the person to the left on the front camera. The orange box highlights the truck on the rear image.

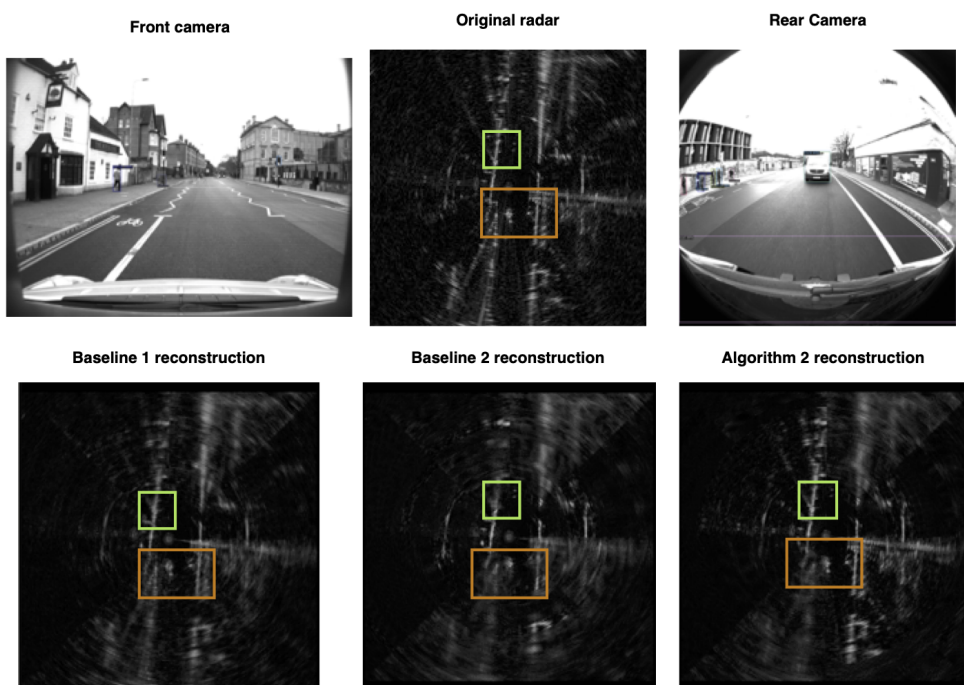

Figure 8: Scene 1 frame 5. The green box on the radar data, shows the person to the left on the front camera. The orange box highlights the truck on the rear image.

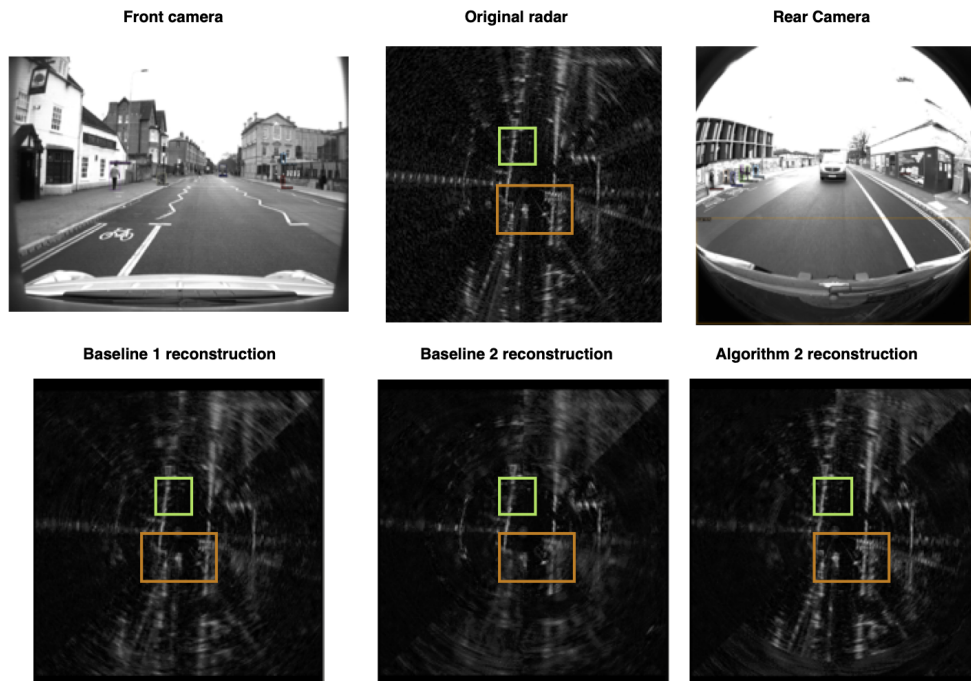

Figure 9: Scene 1 frame 6. The green box on the radar data, shows the person to the left on the front camera. The orange box highlights the truck and the pedestrians on the rear image.

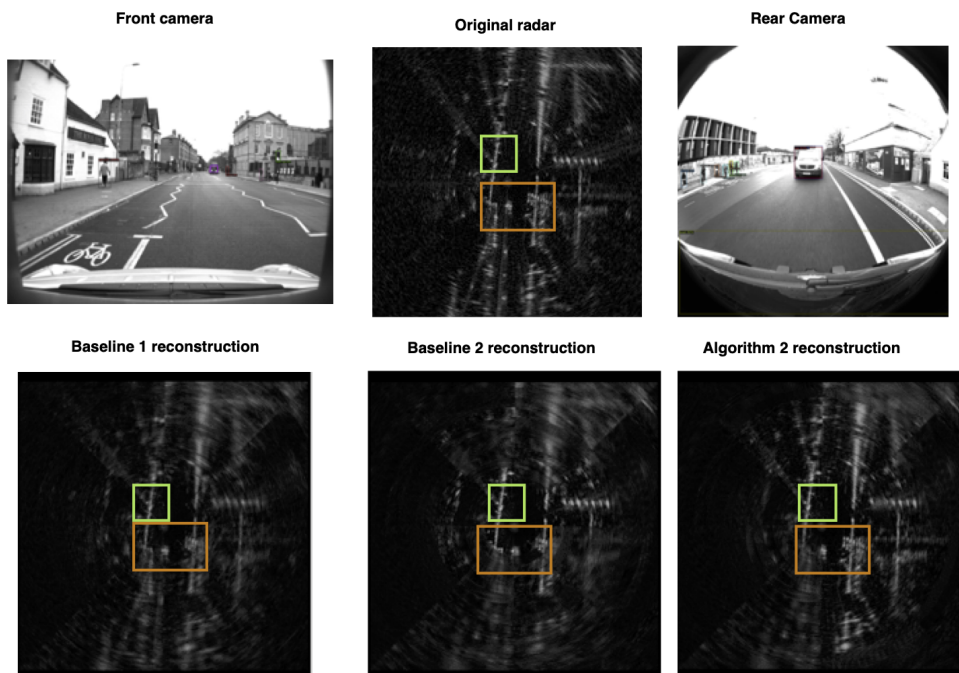

Figure 10: Scene 1 frame 7. The green box on the radar data, shows the person to the left on the front camera. The orange box highlights the truck and the pedestrians on the rear image.

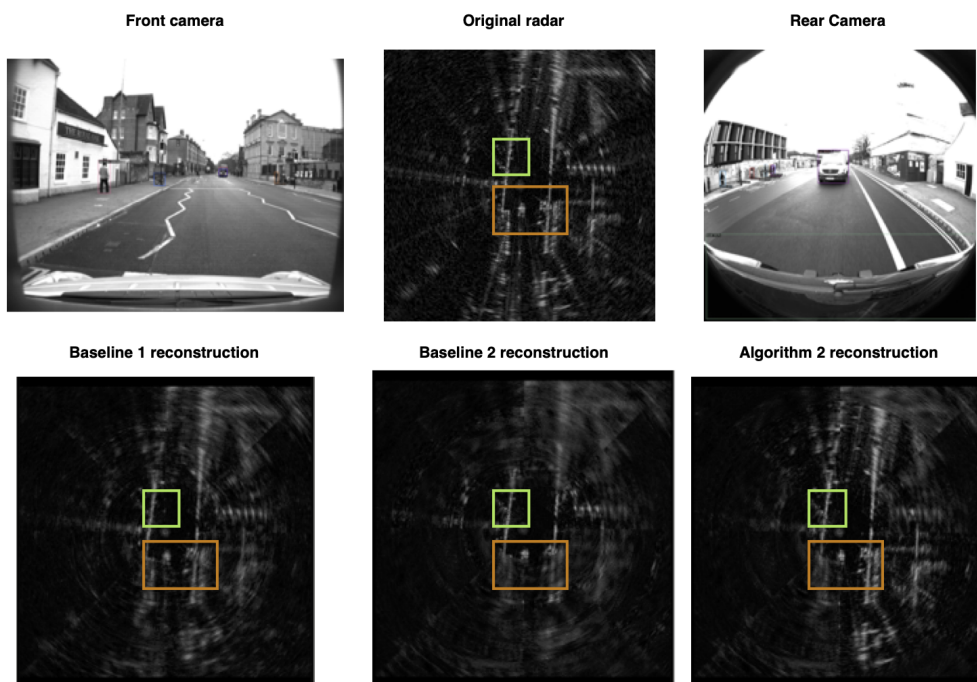

Figure 11: Scene 1 frame 8. The green box on the radar data, shows the person to the left on the front camera. The orange box highlights the truck and the pedestrians on the rear image.

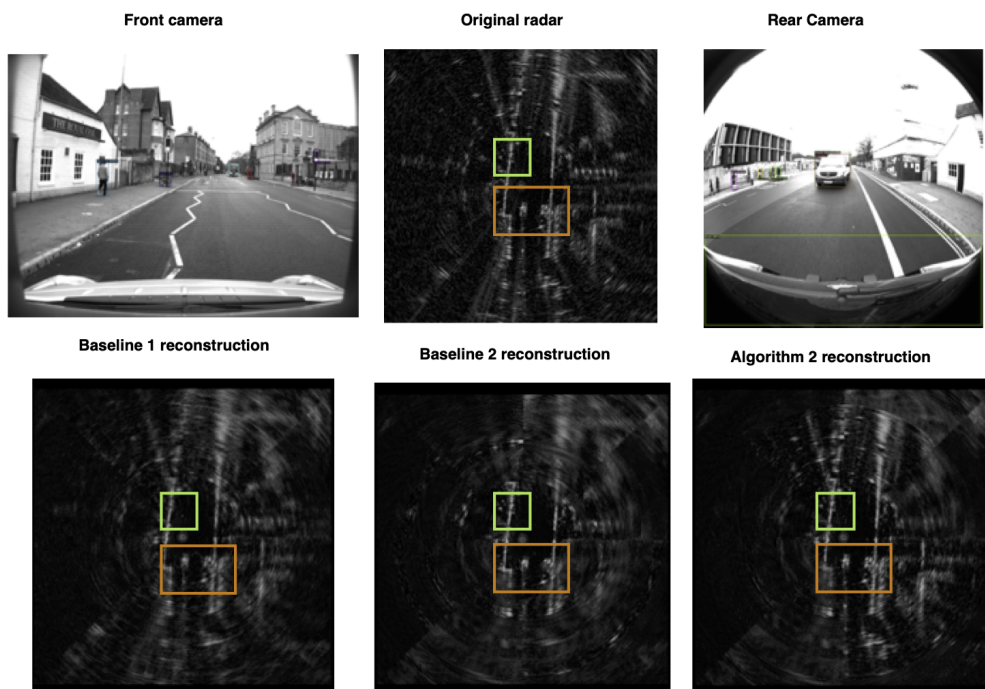

Figure 12: Scene 1 frame 9. The green box on the radar data, shows the person to the left on the front camera. The orange box highlights the truck and the pedestrians on the rear image.

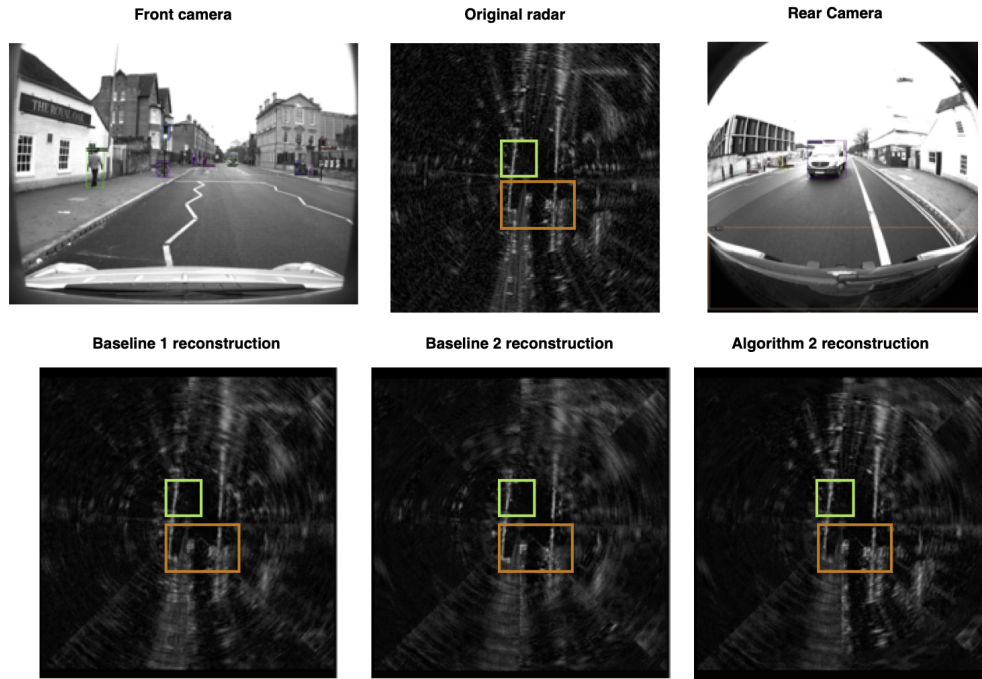

Figure 13: Scene 1 frame 10. The green box on the radar data, shows the person to the left on the front camera. The orange box highlights the truck and the pedestrians on the rear image.

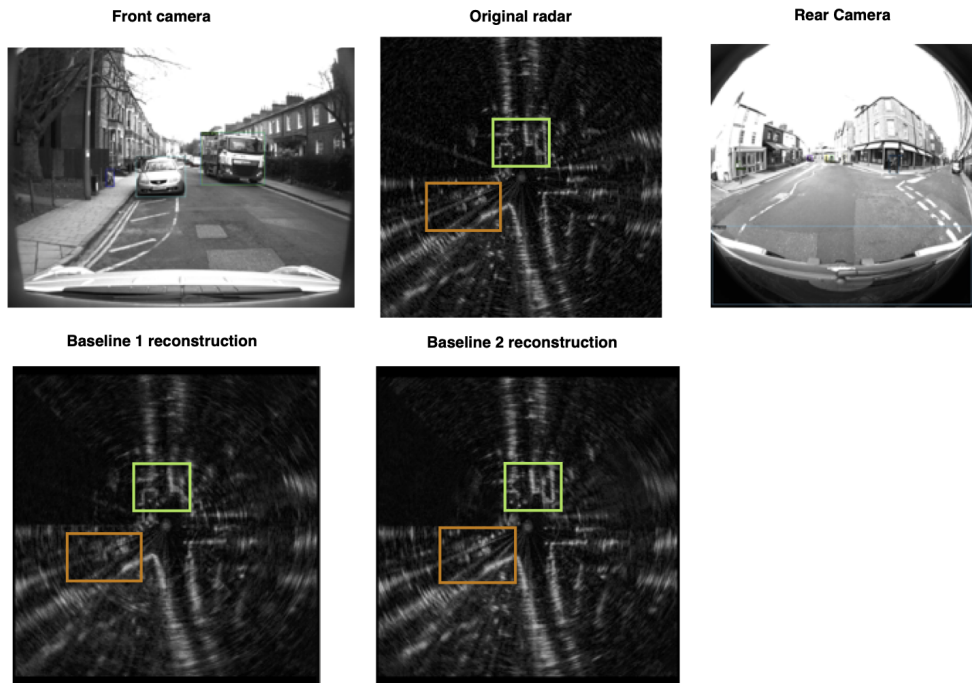

Figure 14: Scene 2 frame 1. The green box on the radar data, shows the car and truck on the front camera. The orange box highlights the car to the left on the rear image.



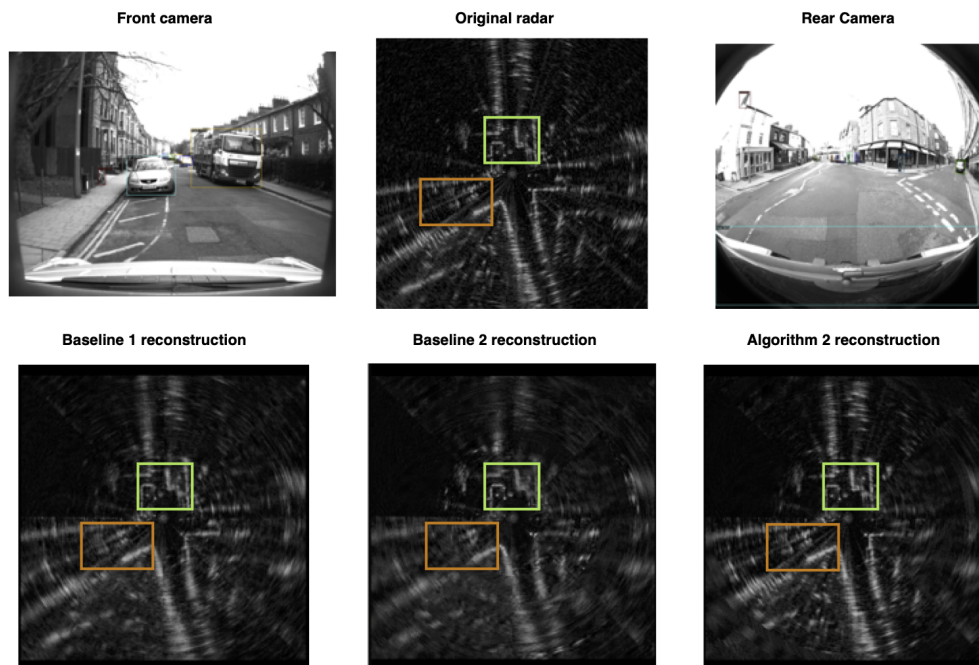

Figure 15: Scene 2 frame 2. The green box on the radar data, shows the car and truck on the front camera. The orange box highlights the car to the left on the rear image.

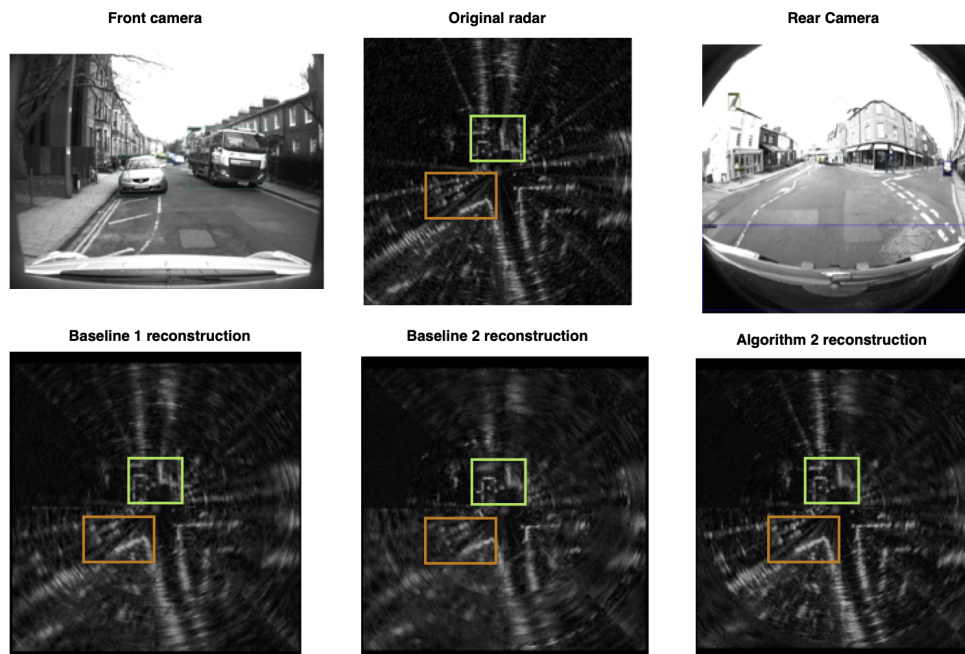

Figure 16: Scene 2 frame 3. The green box on the radar data, shows the car and truck on the front camera. The orange box highlights the car to the left on the rear image.



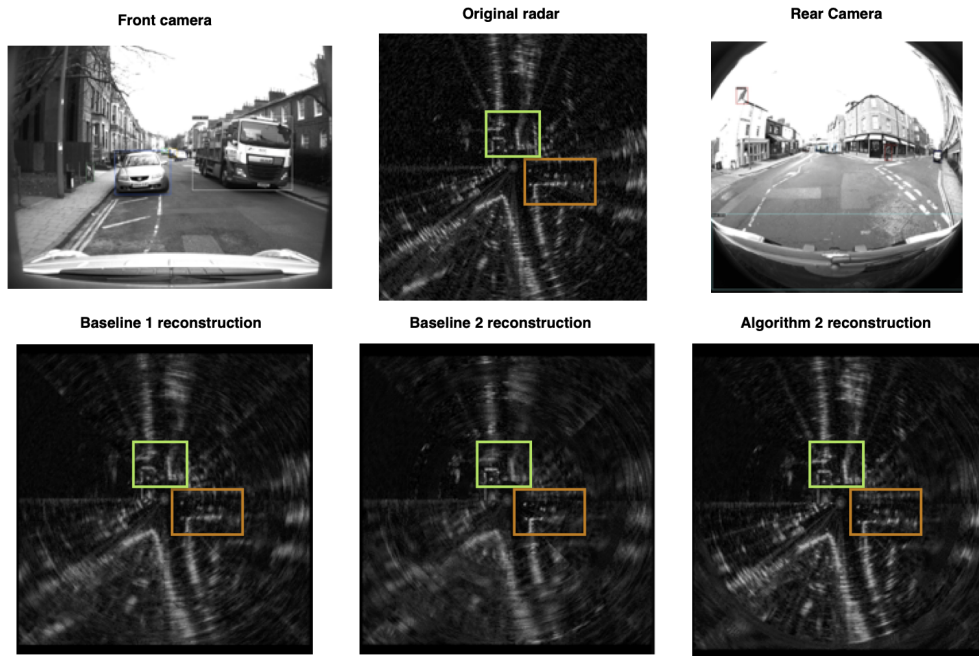

Figure 17: Scene 2 frame 4. The green box on the radar data, shows the car and truck on the front camera. The orange box highlights the car to the right on the rear image.

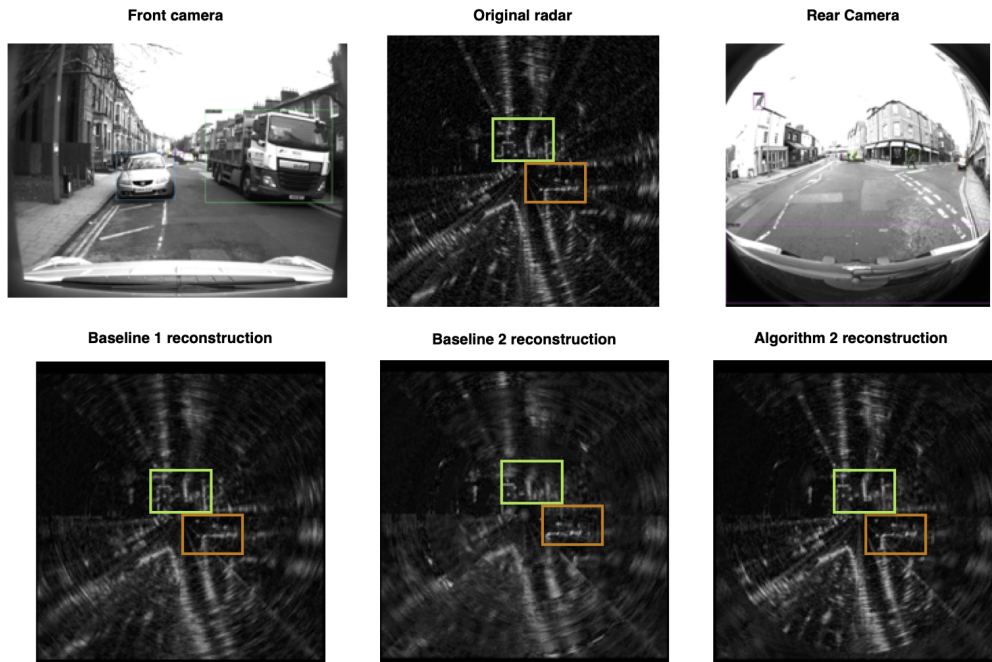

Figure 18: Scene 2 frame 5. The green box on the radar data, shows the car and truck on the front camera. The orange box highlights the car to the right on the rear image.

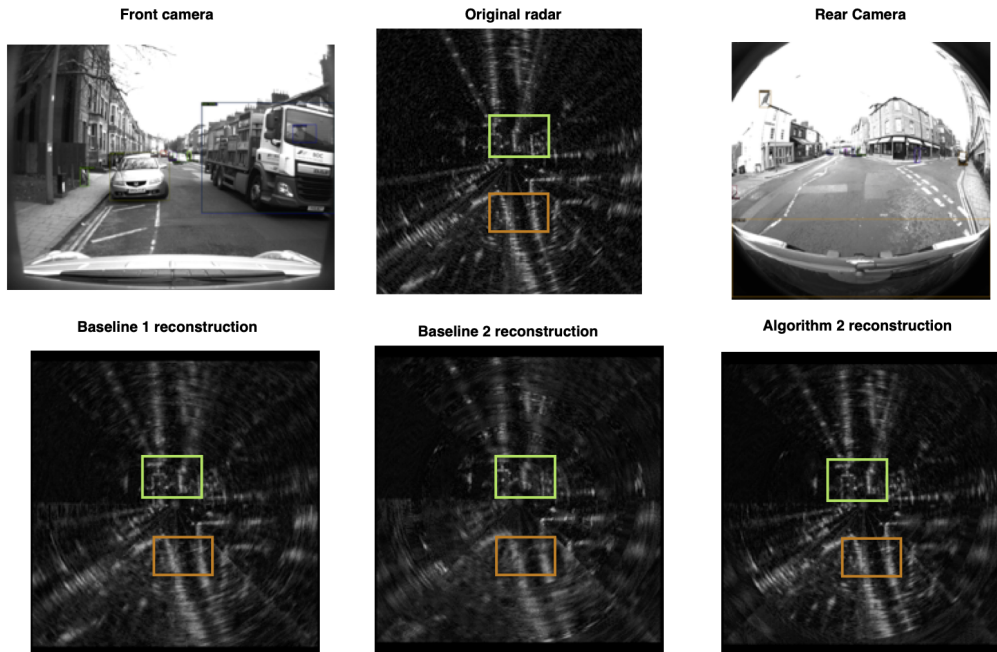

Figure 19: Scene 2 frame 6. The green box on the radar data, shows the car and truck on the front camera. The orange box highlights the pedestrians and bicycle on the rear image.

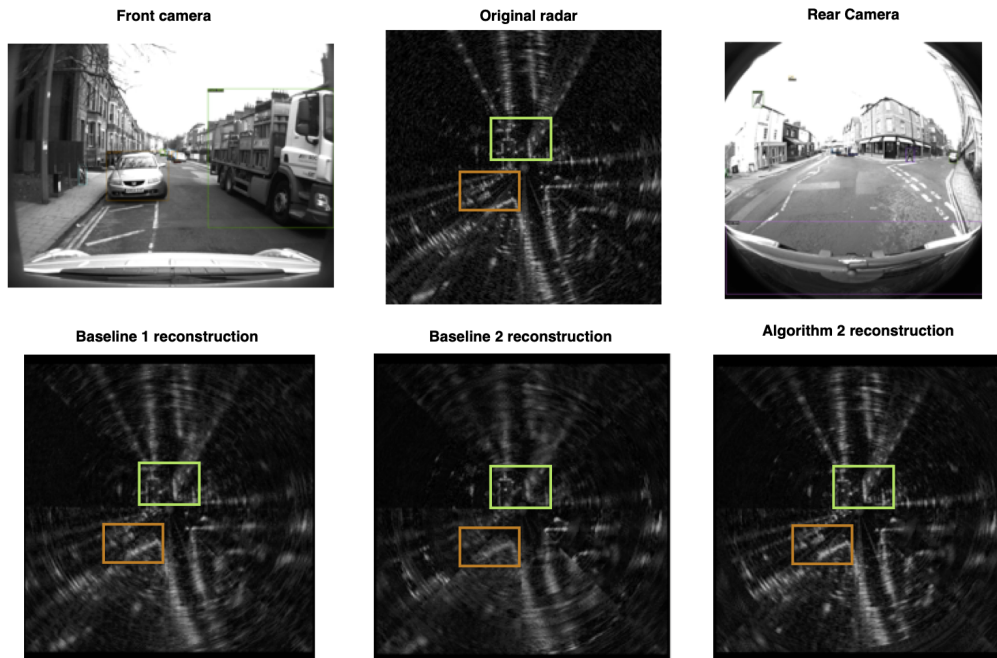

Figure 20: Scene 2 frame 7. The green box on the radar data, shows the car and truck on the front camera. The orange box highlights the cars to the left on the rear image.

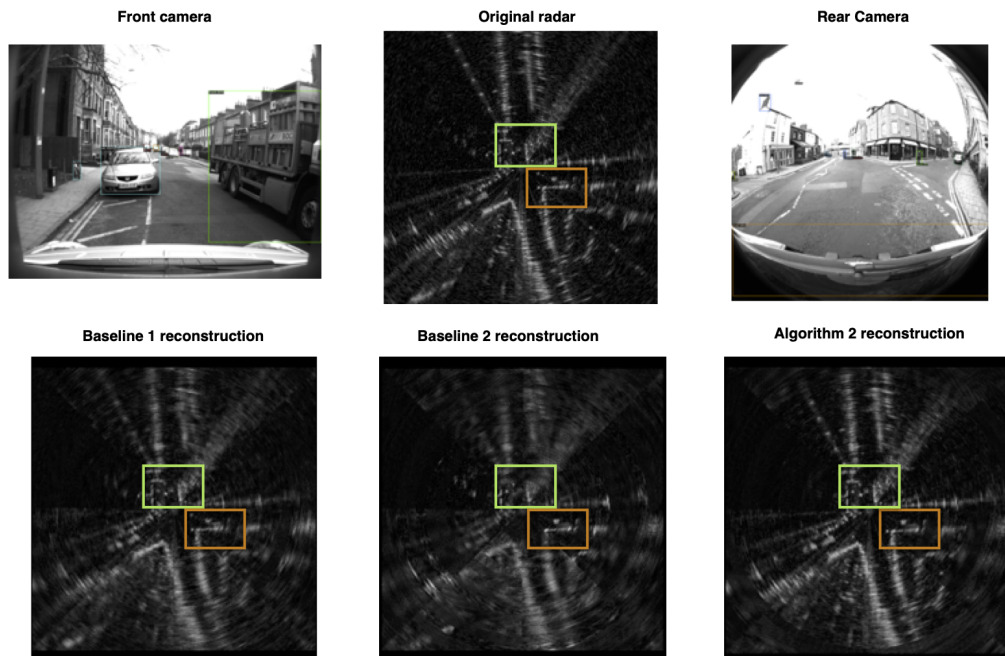

Figure 21: Scene 2 frame 8. The green box on the radar data, shows the car and truck on the front camera. The orange box highlights the car to the right on the rear image.

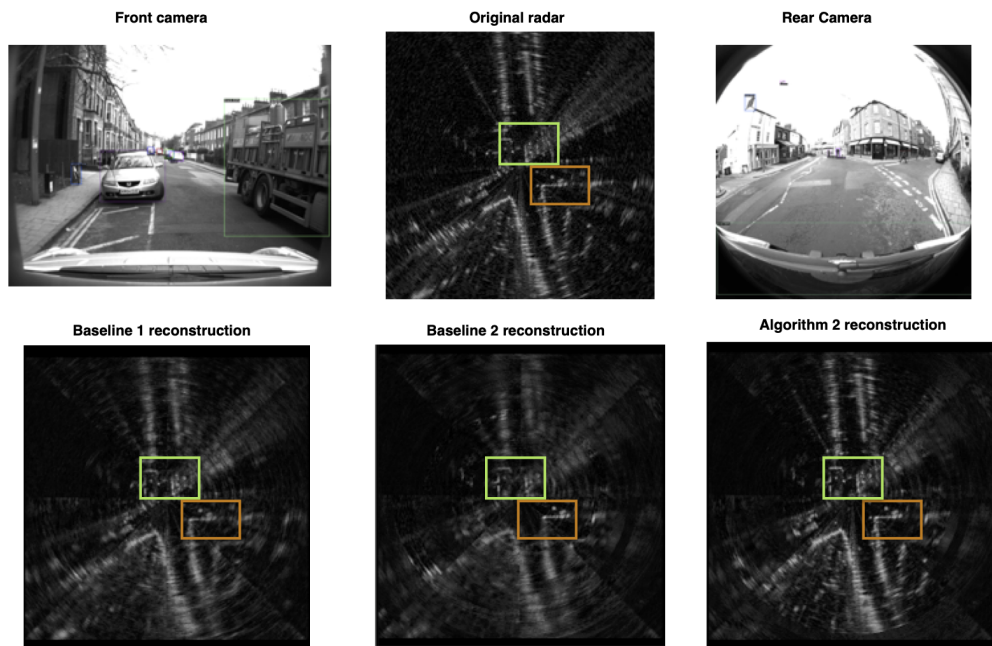

Figure 22: Scene 2 frame 9. The green box on the radar data, shows the car and truck on the front camera. The orange box highlights the car to right on the rear image.



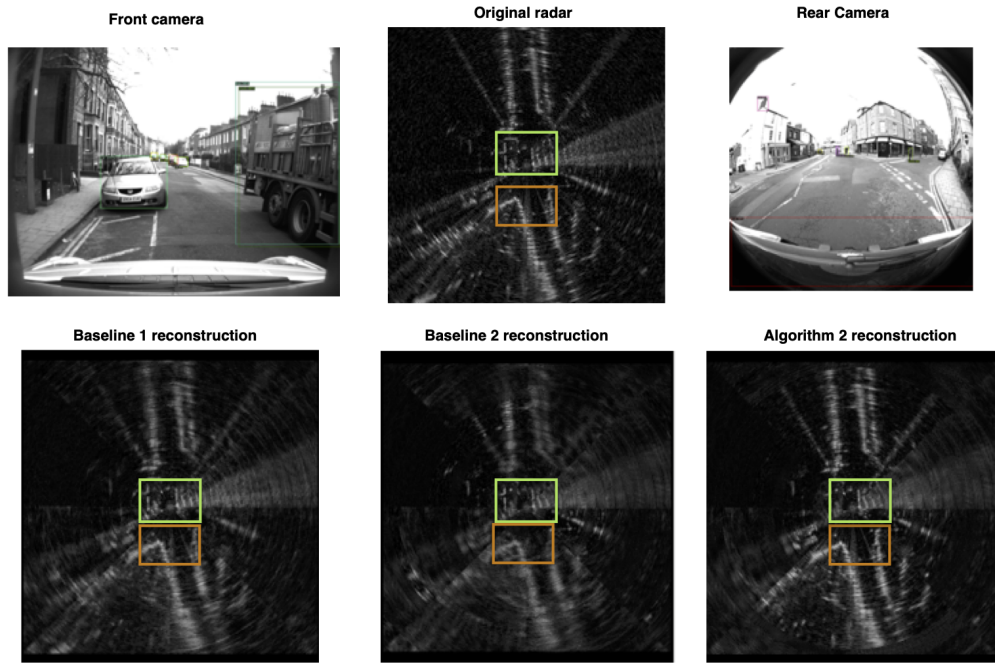

Figure 23: Scene 2 frame 10. The green box on the radar data, shows the car and truck on the front camera. The orange box highlights the pedestrians on the rear image.

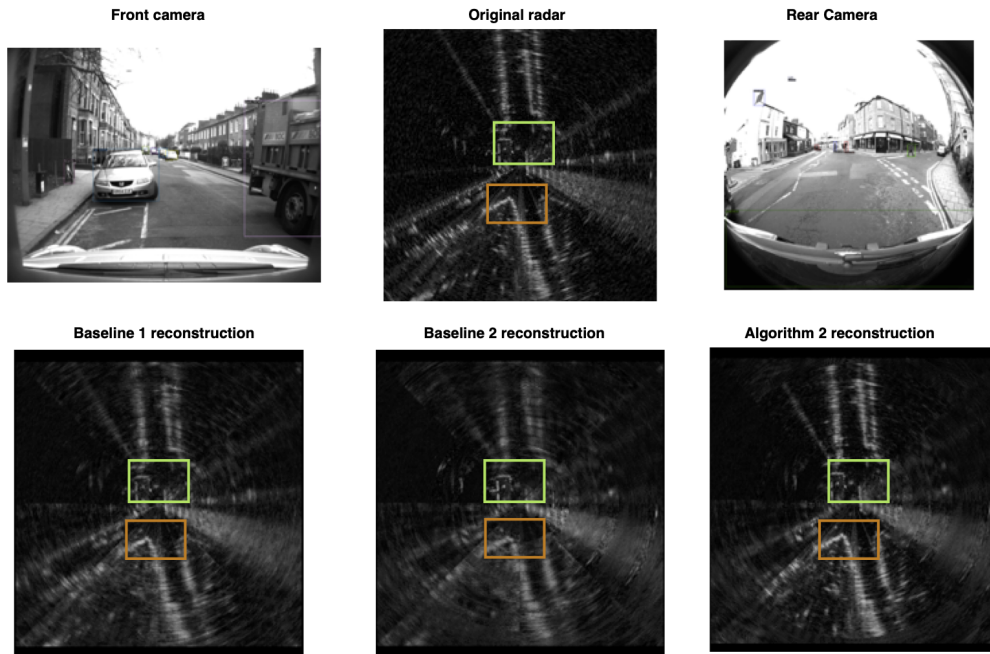

Figure 24: Scene 2 frame 11. The green box on the radar data, shows the car and truck on the front camera. The orange box highlights the pedestrians on the rear image.

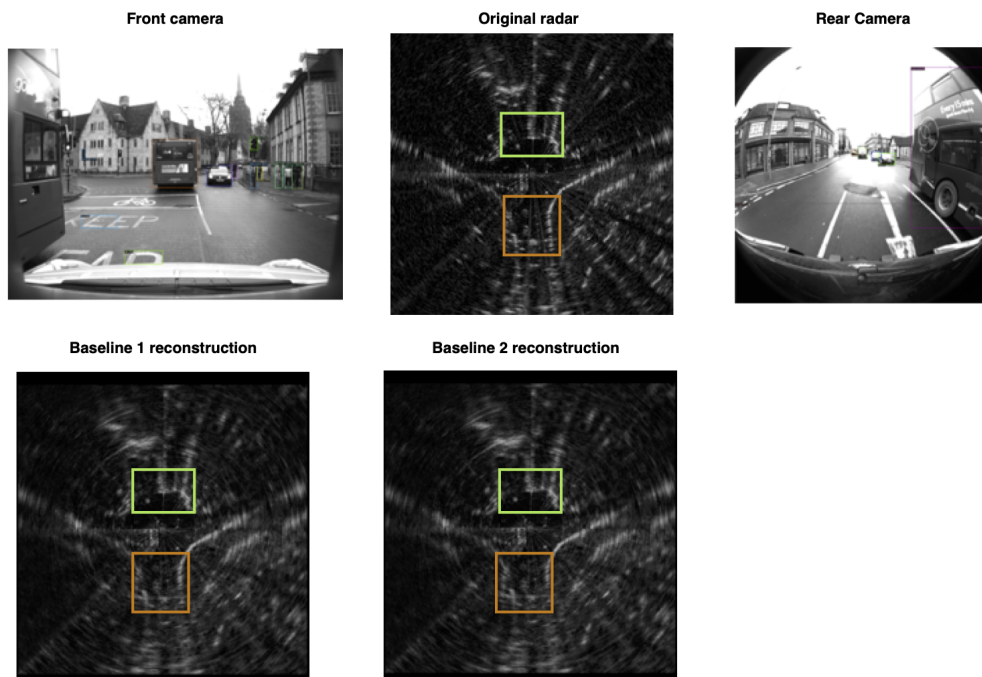

Figure 25: Scene 3 frame 1. The green box on the radar data, shows the car and bus on the front camera. The orange box highlights the cars on the rear image.

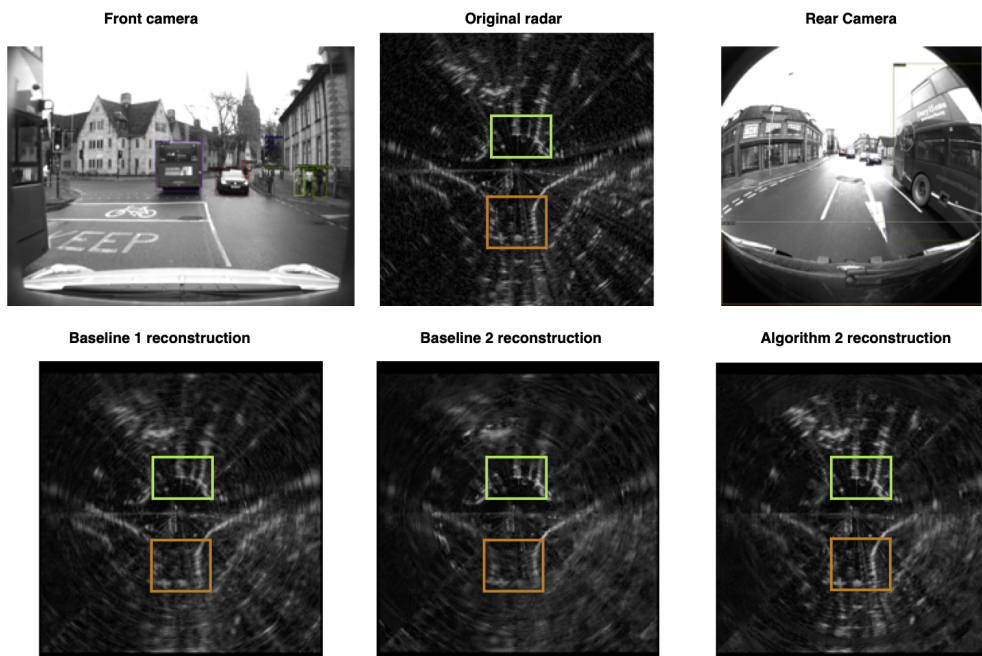

Figure 26: Scene 3 frame 2. The green box on the radar data, shows the car and bus on the front camera. The orange box highlights the cars on the rear image.



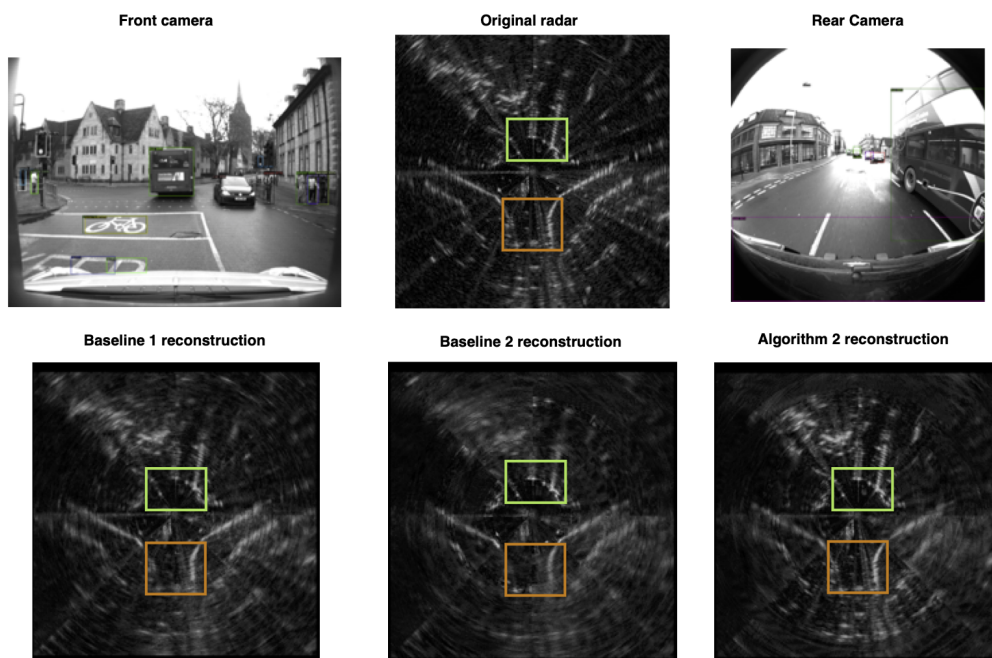

Figure 27: Scene 3 frame 3. The green box on the radar data, shows the car and bus on the front camera. The orange box highlights the cars on the rear image.

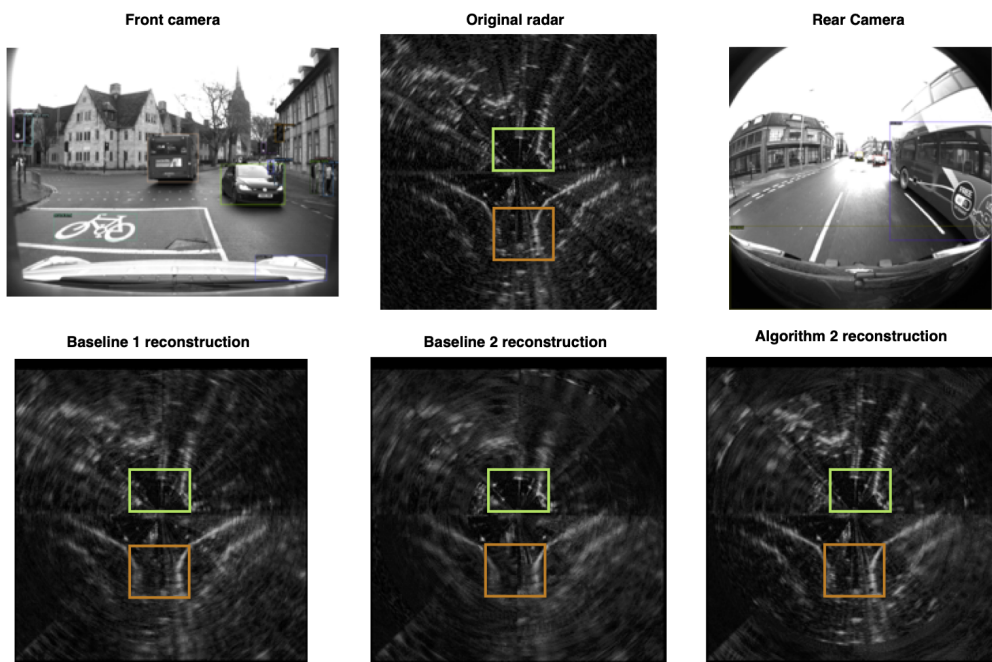

Figure 28: Scene 3 frame 4. The green box on the radar data, shows the car and bus on the front camera. The orange box highlights the cars on the rear image.

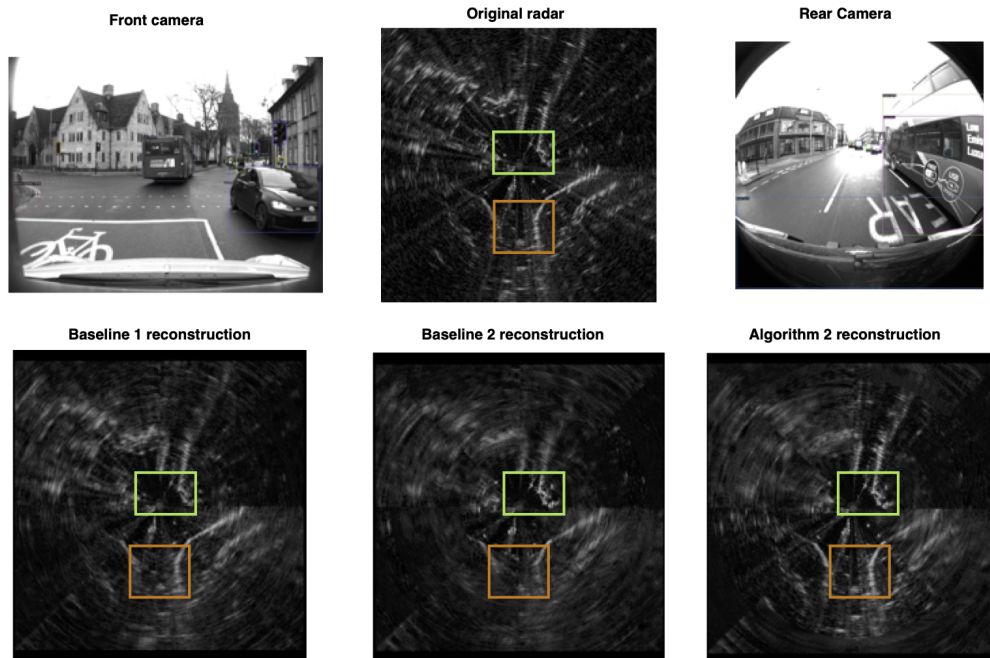

Figure 29: Scene 3 frame 5. The green box on the radar data, shows the car on the front camera. The orange box highlights the cars on the rear image.

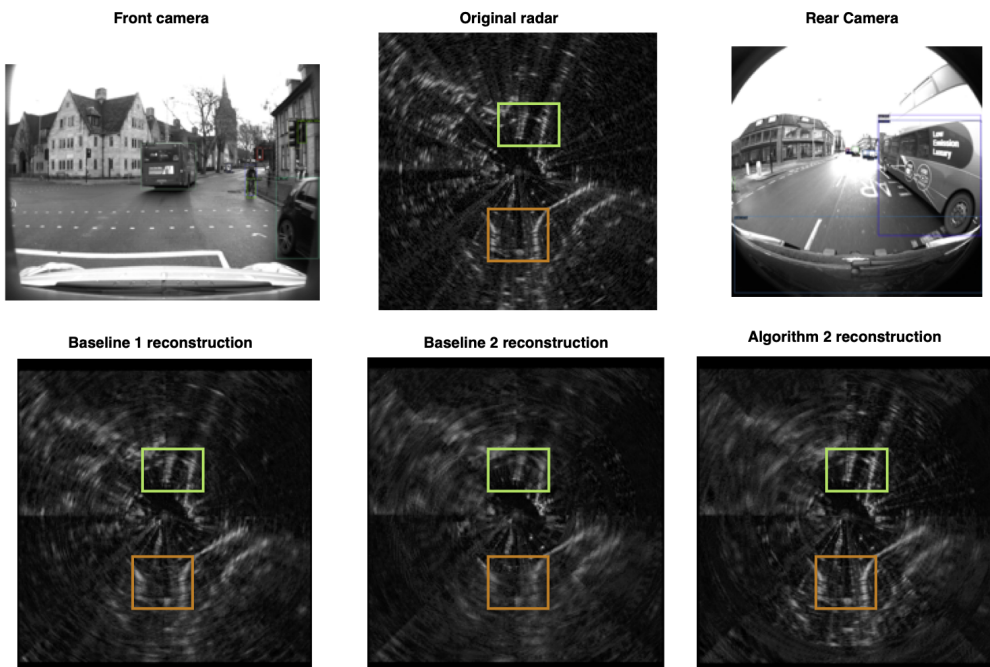

Figure 30: Scene 3 frame 6. The green box on the radar data, shows the bus on the front camera. The orange box highlights the cars on the rear image.

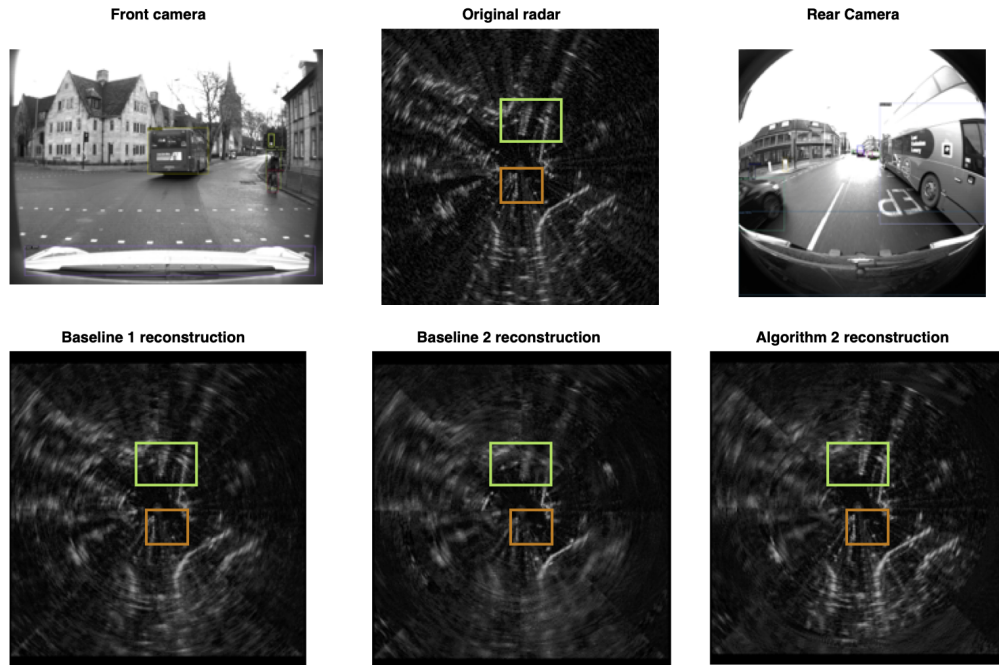

Figure 31: Scene 3 frame 7. The green box on the radar data, shows the bus on the front camera. The orange box highlights the car on the rear image.

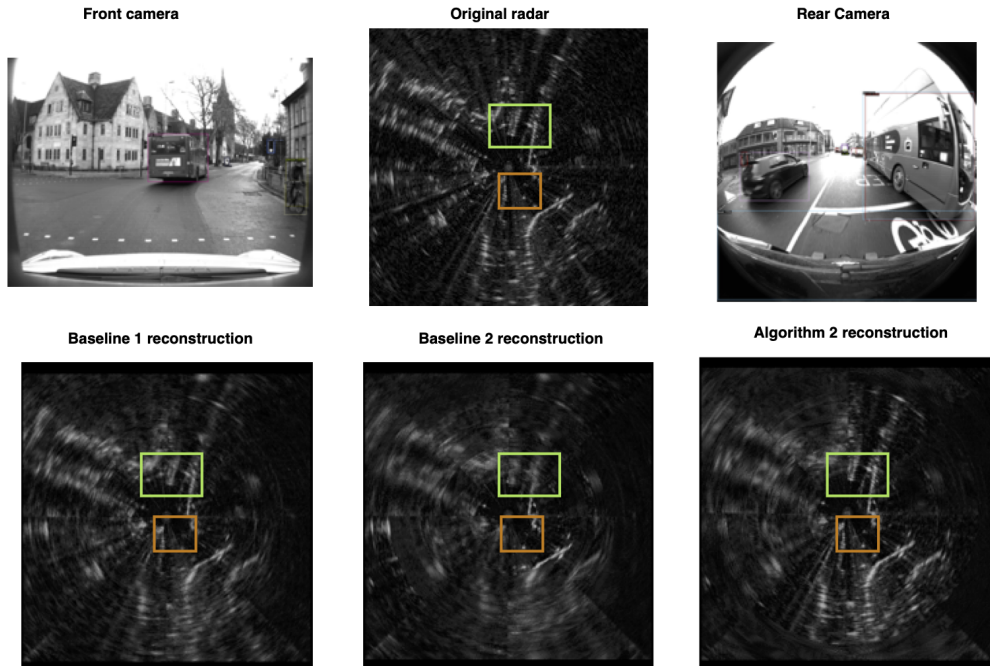

Figure 32: Scene 3 frame 8. The green box on the radar data, shows the bus on the front camera. The orange box highlights the car on the rear image.



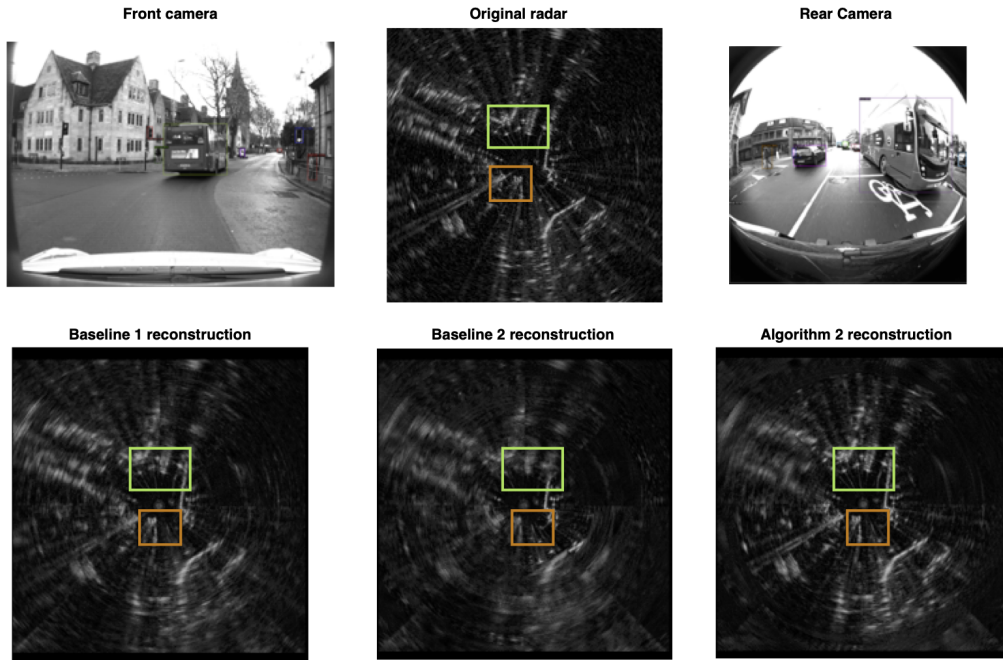

Figure 33: Scene 3 frame 9. The green box on the radar data, shows the bus on the front camera. The orange box highlights the bus on the rear image.

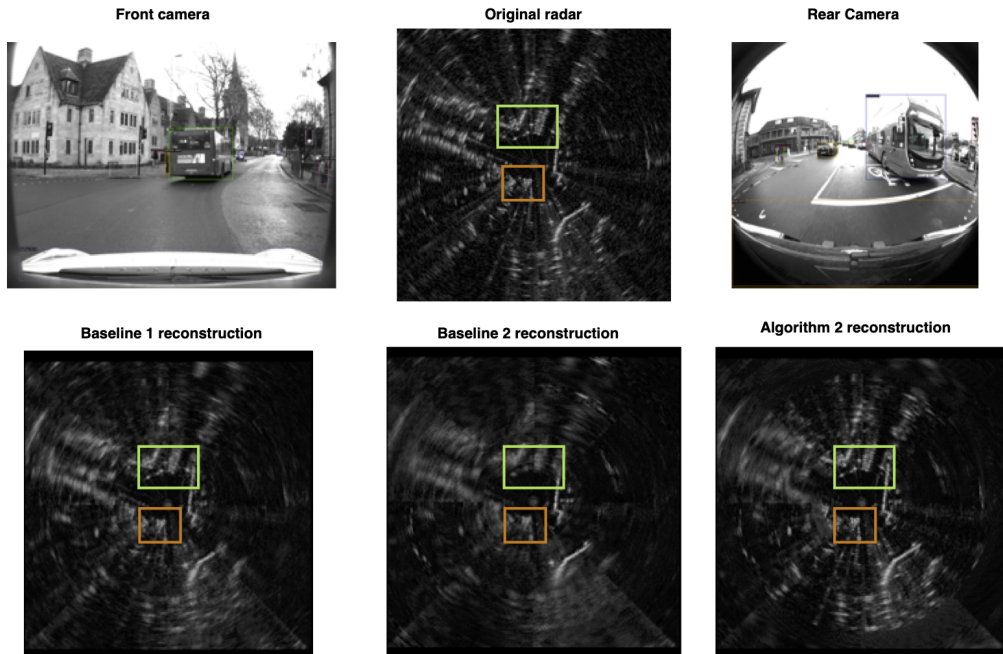

Figure 34: Scene 3 frame 10. The green box on the radar data, shows the bus on the front camera. The orange box highlights the bus on the rear image.

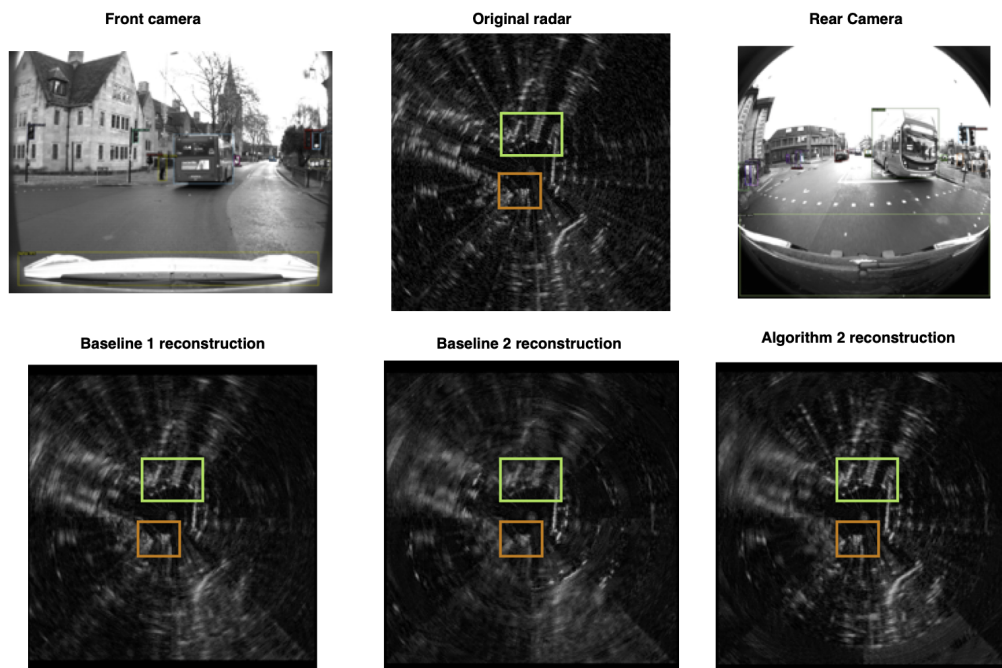

Figure 35: Scene 3 frame 11. The green box on the radar data, shows the bus on the front camera. The orange box highlights the bus on the rear image.
